# Supplementary material
Source: publisher site journal article supplement (https://www.spandidos-publications.com/8230/downloadSupplementary)
Supplement: Supplementary file 1 [file downloadSupplementary]

**Table SI.** siRNA sequences.

| siRNA            | Sequence (5'-3')      |
|------------------|-----------------------|
| ULK1-1           |                       |
| Sense            | GGAGCAAGAGCACACGGAA   |
| Antisense        | UCCCGUGUGCUCUUGCUCC   |
| ULK1-2           |                       |
| Sense            | GCCUUUCAUCUACUGUGAATT |
| Antisense        | UUCACAGUAGAUGAAAGGCTT |
| ULK1-3           |                       |
| Sense            | GCUUGCGACUUCAGCGCUUTT |
| Antisense        | AAGCGCUGAAGUCGCAAGCTT |
| Beclin1          |                       |
| Sense            | GGCACAAUCAAUAAUUUCATT |
| Antisense        | UGAAAUAUUGAUUGUGCCTT  |
| NCOA4            |                       |
| Sense            | GCCCUACAAUGUGAGUGAUTT |
| Antisense        | AUCACUCACAUUGUAGGGCTT |
| Negative control |                       |
| Sense            | UUCUCCGAACGUGUCACGUTT |
| Antisense        | TTAAGAGGCUUGCACAGUGCA |

ULK1, serine/threonine protein kinase ULK1; NCOA4, nuclear receptor coactivator 4; siRNA, small interfering RNA.

**Table SII.** Antibodies for western blotting.

| <b>Antibodies</b> | <b>Manufacturer</b>        | <b>Workingconcentration</b> | <b>Catalogue no.</b> |
|-------------------|----------------------------|-----------------------------|----------------------|
| ULK1              | ABclonal Biotech Co., Ltd. | 1:1,000                     | A8529                |
| Beclin1           | Proteintech Group, Inc.    | 1:1,000                     | 1306-1-AP            |
| LC3-II            | ABclonal Biotech Co., Ltd. | 1:1,000                     | A5618                |
| P62               | ABclonal Biotech Co., Ltd. | 1:1,000                     | A19700               |
| NCOA4             | ABclonal Biotech Co., Ltd. | 1:1,000                     | A5695                |
| VPS34             | Proteintech Group, Inc.    | 1:1,000                     | 12452-1-AP           |
| FTH1              | ABclonal Biotech Co., Ltd. | 1:1,000                     | A1144                |
| $\beta$ -actin    | Proteintech Group, Inc.    | 1:5,000                     | 66009-1-Ig           |

ULK1, serine/threonine protein kinase ULK1; LC3-II, microtubule-associated protein 1 light chain 3 $\beta$ ; NCOA4, nuclear receptor coactivator 4; VPS34, PI3K catalytic subunit type 3;FTH1, ferritin heavy chain 1.

**Table SIII.** Antibodies for staining.

| <b>Antibodies</b> | <b>Manufacturer</b>                      | <b>Workingconcentration</b> | <b>Catalogue number</b> |
|-------------------|------------------------------------------|-----------------------------|-------------------------|
| 4-HNE             | ABclonal Biotech Co., Ltd.               | 1:100                       | A26085                  |
| LC3-II            | ABclonal Biotech Co., Ltd.               | 1:100                       | A19665                  |
| NCOA4             | Santa Cruz Biotechnology, Inc.           | 1:100                       | sc-373739               |
| $\alpha$ -SMA     | Wuhan Boster Biological Technology, Ltd. | 1:100                       | BM4172                  |

4-HNE, 4-hydroxynonenal; LC3-II, microtubule-associated protein 1 light chain 3 $\beta$ ; NCOA4, nuclear receptor coactivator 4.
